# Supplementary material for: Land-use trajectories for sustainable land system transformations: Identifying leverage points in a global biodiversity hotspot
Source: PubMed Central journal article supplement — Proc Natl Acad Sci U S A. 2022 Feb 14;119(7):e2107747119. doi: 10.1073/pnas.2107747119 (PMC8851510; doi:10.1073/pnas.2107747119), 2022-02-14
Supplement: pnas.2107747119.sapp.pdf [file pnas.2107747119.sapp.pdf]

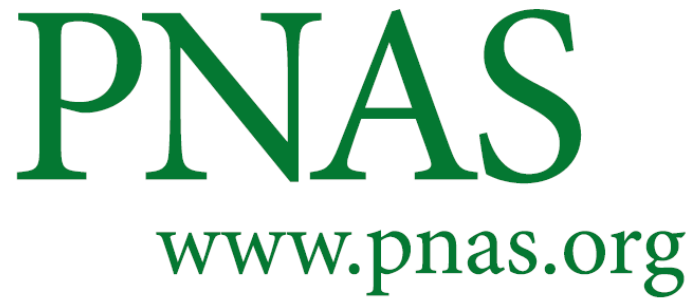

### **Supplementary Information for**

Land-use trajectories for sustainable land system transformations:  
identifying leverage points in a global biodiversity hotspot

Dominic Andreas Martin\*, Fanilo Andrianisaina, Thio Rosin Fulgence, Kristina Osen, Anjahirinony Andry Ny Aina Rakotomalala, Estelle Raveloaritiana, Marie Rolande Sozafy, Annemarie Wurz, Rouvah Andriafanomezantsoa, Harilala Andriamaniraka, Aristide Andrianarimisa, Jan Barkmann, Saskia Dröge, Ingo Grass, Nathaly Guerrero-Ramirez, Hendrik Hänke, Dirk Hölscher, Bakolimalala Rakouth, Hery Lisy Tiana Ranarijaona, Romual Randriamanantena, Fanomezana Mihaja Ratsoavina, Lala Harivelo Raveloson Ravaomanarivo, Dominik Schwab, Teja Tschardtke, Delphine Clara Zemp, & Holger Kreft

\*Dominic Andreas Martin

Email: [dominic.martin@wyssacademy.org](mailto:dominic.martin@wyssacademy.org)

#### **This file includes:**

- Supplementary text
- Figures S1 to S3
- Table S1
- SI References

## 1 **Supplementary Information Text**

2 **Sampled land-use types biodiversity and ecosystem functions.** We sampled the seven  
3 predominant land-use types of north-eastern Madagascar. Large connecting *old-growth forest*, our  
4 historic baseline, once covered the study region but is now restricted to protected areas. *Forest*  
5 *fragments* result from fragmentation and degradation of old-growth forest and exist scattered  
6 throughout the region. *Forest-derived vanilla agroforests* are established inside forest fragments  
7 via thinning of understory shrubs and planting of vanilla (1). However, forests in the region are also  
8 cut and burned, thereby entering the shifting hill rice cultivation cycle. The system, referred to as  
9 'tavy' in Malagasy, involves the use of fire directly before rice can be planted at the beginning of  
10 the rainy season and rice can be harvested at the end of the rainy season. When sampled for  
11 biodiversity and ecosystem functions 6-21 months after harvest, these *hill rice* fields had already  
12 turned into herbaceous fallows (Malagasy: 'Matrangy'). Thereafter, shrubs and small trees  
13 establish, resulting in *woody fallows* (Malagasy: 'Savoka'). The woody fallows sampled in our study  
14 had last burned 4-16 years prior to the onset of our data collection in September 2017. *Fallow-*  
15 *derived vanilla agroforests* are established on such woody fallows, thereby representing open-land-  
16 derived agroforests following Martin et al. 2020 (1). Lastly, we sampled irrigated *rice paddies*  
17 situated on riverbanks and in plains. This land-use type is usually not directly converted from or  
18 converted to one of the other studied land-use types and thus stands outside the trajectory.

19 **Village and site selection biodiversity and ecosystem functions.** We selected 10 villages  
20 based on several criteria (2) from a sample of 60 villages from a previous household survey (3).  
21 Additionally, we chose two old-growth forest sites within Marojejy National park. At each old-growth  
22 forest site, we chose 5 plots, leading to 10 replicates. At the village level, we established plots in a  
23 semi-blocked design, meaning that we chose one plot per land-use type (forest fragment, hill rice,  
24 woody fallow, rice paddy). It was, however, not possible to find suitable forest- and fallow-derived  
25 agroforests in each village - leading to one village without fallow-derived vanilla agroforest and  
26 three villages without forest-derived agroforest (see **Figure S1** for a schematic overview that shows  
27 which plots are represented in which village). Furthermore, fallow-derived vanilla was replicated 20  
28 times, resulting in 80 plots (70 in villages and 10 old-growth forests) overall. These plots form the  
29 sampling design for all (endemic) biodiversity, above-ground carbon, soil pH, soil organic carbon,  
30 and predation rate. More information on the spatial arrangement of the land-use types is published  
31 in Martin et al. 2021 (2).

32 **Ecosystem functions – Above-ground carbon.** To calculate above-ground carbon stocks (Mg  
33 ha<sup>-1</sup>) based on above-ground biomass values, we used the pantropical allometric model (4) with  
34 diameter at breast height, tree height, and wood density as input data. Therefore, we measured  
35 the diameter at breast height and height for each individual tree, following a standardized protocol  
36 (5). Additionally, we derived wood density data for all trees, using either a Pilodyn wood tester, or  
37 retrieved wood density values from the global wood density database (6). For palms, tree ferns,  
38 bananas (*Musa sp.*), and traveller palms (*Ravenala madagascariensis*) we used different  
39 allometric equations to estimate above-ground plant biomass, based on literature. We obtained  
40 above-ground carbon stocks by multiplying the estimated above-ground plant biomass by 0.5,  
41 based on the assumption that plant biomass consists of 50% carbon (7).

42  
43 **Ecosystem functions – Soil organic carbon.** To measure soil organic carbon concentrations, we  
44 took two mixed soil samples per plot using a soil corer (5 cm diameter, 0-15 cm depth, 295 ml  
45 volume). Each mixed sample stemmed from four soil cores taken from four locations. In the  
46 laboratory, we dried the soil samples at 70 °C for 48 hours and grounded them to acquire soil

47 organic carbon values of all 160 mixed samples. We then assessed the total organic carbon (C)  
48 concentrations (millimole gram dry soil<sup>-1</sup>) using a C/N elemental analyzer (Vario EL III, Elementar,  
49 Hanau, Germany) and calculated the mean of the two mixed samples per plot. Lab methods  
50 followed Hertel 2011 (8).

51 **Agricultural productivity.** We collected data through a longitudinal survey from October 2017 to  
52 October 2018, field measurements of plot sizes, and a recall survey between October 2018 and  
53 March 2019. We used data of 109 households located in 10 study villages. These villages are  
54 situated in the same region as the 10 villages where we collected plot data, and both sets of 10  
55 villages are a subset of the 60 villages included in Hänke et al. 2018 (3), but only one village is  
56 included in both samples. The longitudinal survey used pictogram sheets to facilitate bi-weekly data  
57 reporting by household heads for over one year. We further considered one person-day to be  
58 equivalent to eight working hours and converted working hours into adult male equivalents (9) This  
59 provided information on total family labor as well as expenses and revenues of vanilla and rice  
60 farming. We measured the size of each plot of vanilla, paddy rice, and hill rice farmed by the 109  
61 households *in-situ* using a GPS device. During plot visits, we also obtained data on the plot's land-  
62 use history. Moreover, we conducted a cross-sectional survey to obtain additional information on  
63 farming inputs and outputs.

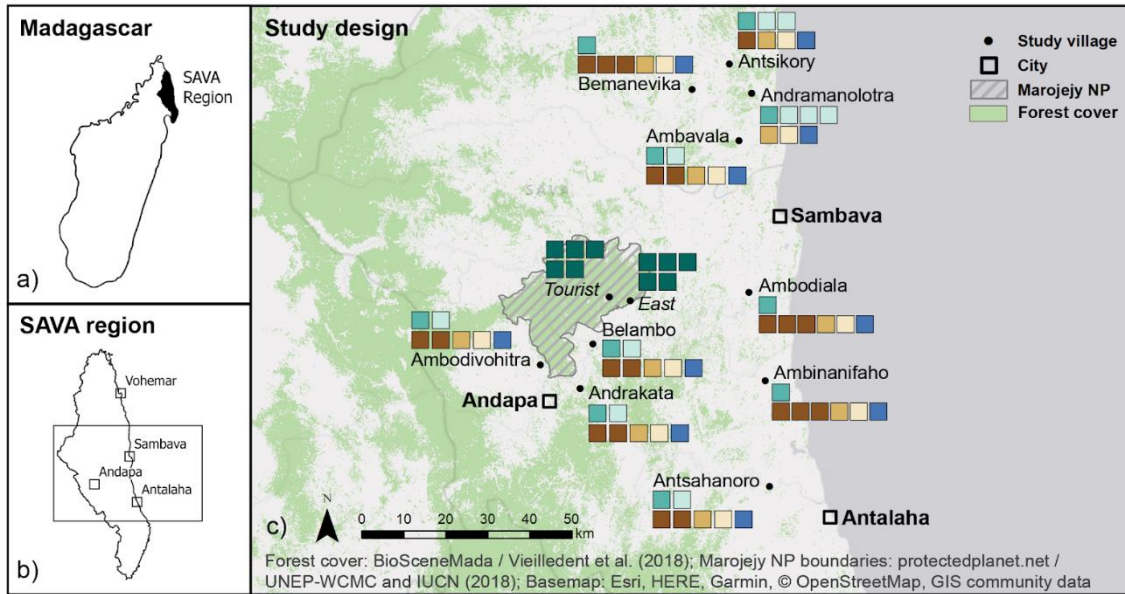

64  
65  
66  
67  
68  
69  
70  
71  
72

**Figure S1. Study design overview. a)** The island of Madagascar off East Africa with the SAVA region. **b)** SAVA region with its four main cities and the study area. **c)** Study area with 2017 forest cover (16), roads, rivers and the three major cities Sambava, Antalaha, and Andapa, as well as the 10 study villages and Marojejy National Park where we collected data on biodiversity and ecosystem functions. The colored squares depict the semi-blocked study design with replicated land-use types across 10 villages and two old-growth forest sites. Each square represents one plot, a legend for the colors can be found in **Figure S2**. The 10 villages where we collected data on yields and profits are not displayed.

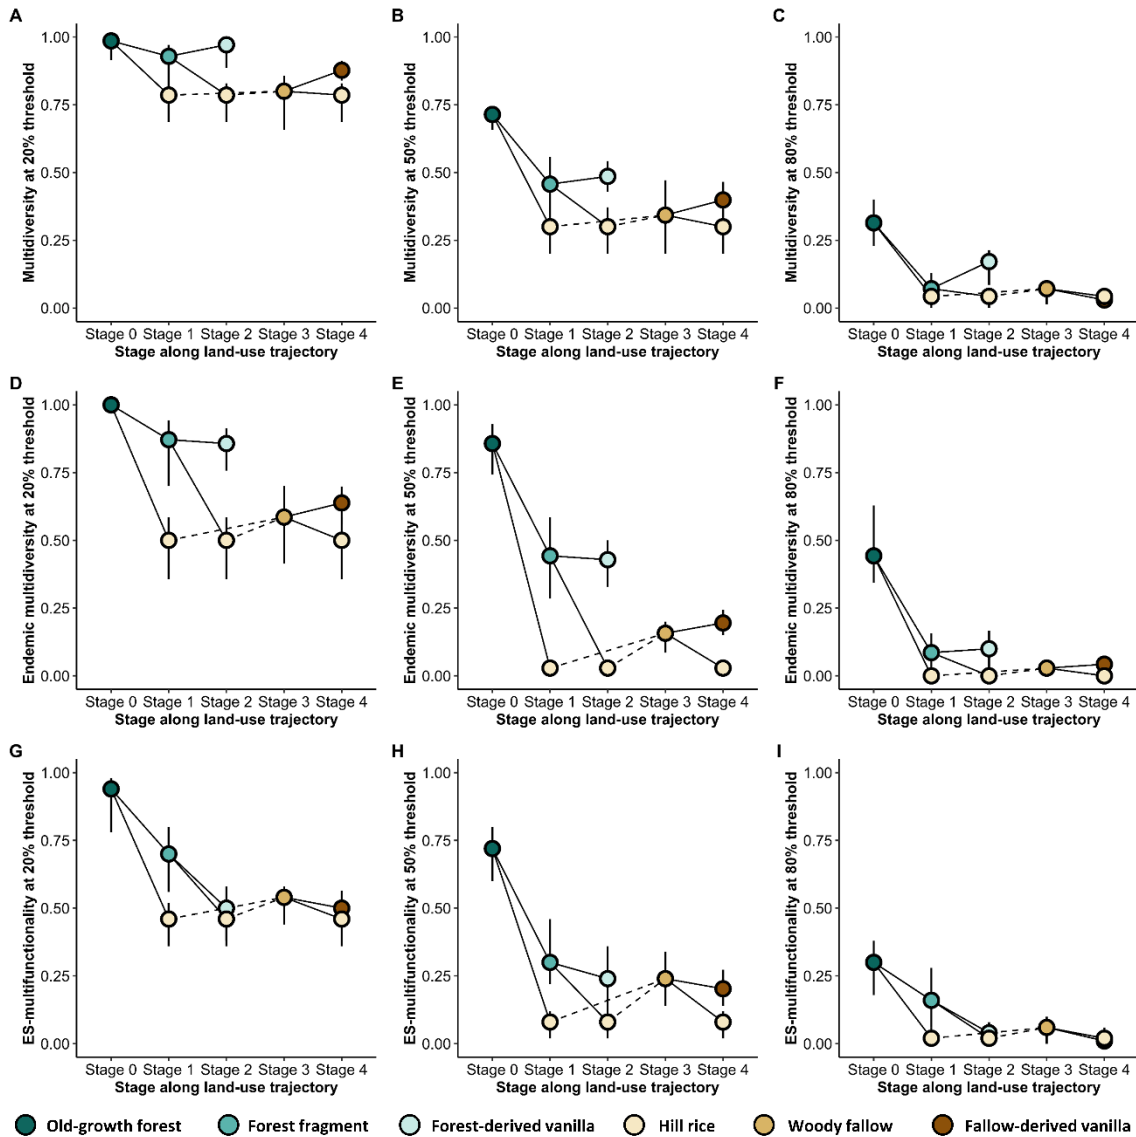

73 ● Old-growth forest ● Forest fragment ● Forest-derived vanilla ● Hill rice ● Woody fallow ● Fallow-derived vanilla  
 74 **Figure S2. Multidiversity, endemic multidiversity and multifunctionality at stages along a**  
 75 **land-use trajectory in north-eastern Madagascar at the 20%, 50% and 80% thresholds.**  
 76 Differences in multidiversity (**A, B & C**) between stages along the land-use trajectory are  
 77 strongest at the 50% threshold. The leverage point with the strongest potential for biodiversity  
 78 conservation, i.e., most taxa failing to pass the threshold after conversion, is leverage point 1  
 79 (old-growth forest). Differences in endemic multidiversity (**D, E & F**) between land-use types  
 80 along the land-use trajectory are strongest at the 20% threshold. The leverage point with the  
 81 strongest potential, i.e., most taxa failing to pass the threshold after conversion, is leverage point  
 82 1 (old-growth forest). Multifunctionality (**G, H & I**) shows less pronounced differences between  
 83 land-use types at the 20% and 80% threshold but is most different at the 50% threshold. Points  
 84 colored according to the land-use type represent the mean value for each land-use type while  
 85 error bars are 95% confidence intervals.

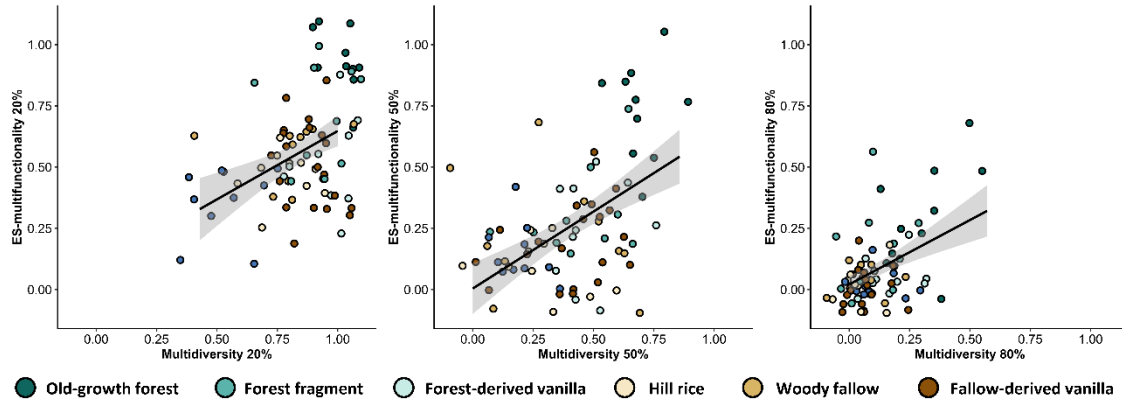

86  
87  
88  
89  
90  
91

**Figure S3. Correlation between multidiversity and multifunctionality at the 20%, 50% and 80% thresholds.** Each point represents one plot and lines show the correlation between the two variables. Ribbons represent 95% confidence intervals. Note that the plot employs jittering to avoid overplotting. Spearman correlation coefficients are 0.41, 0.53, and 0.48 for the 20%, 50%, and 80% threshold, respectively.

92 **Table S1.** Sources of endemism status across all seven taxa covered

| <b>Taxa</b>       | <b>Source</b>                                                                                                                                                                                                                                                                                                                                                                                                                                                                                                  | <b>Reference</b>                     |
|-------------------|----------------------------------------------------------------------------------------------------------------------------------------------------------------------------------------------------------------------------------------------------------------------------------------------------------------------------------------------------------------------------------------------------------------------------------------------------------------------------------------------------------------|--------------------------------------|
| Trees             | Catalogue of the Plants of Madagascar                                                                                                                                                                                                                                                                                                                                                                                                                                                                          | Missouri Botanical Garden, 2019 (10) |
| Herbaceous plants | Catalogue of the Plants of Madagascar                                                                                                                                                                                                                                                                                                                                                                                                                                                                          | Missouri Botanical Garden, 2019 (10) |
| Birds             | BirdLife Species Factsheets                                                                                                                                                                                                                                                                                                                                                                                                                                                                                    | BirdLife, 2018 (11)                  |
| Amphibians        | Amphibiaweb                                                                                                                                                                                                                                                                                                                                                                                                                                                                                                    | Amphibia Web Database, 2020 (12)     |
| Reptiles          | Reptile Database                                                                                                                                                                                                                                                                                                                                                                                                                                                                                               | Uetz & Hošek, 2020 (13)              |
| Butterflies       | Classification, diversity, and endemism of the butterflies ( <i>Papilionoidea</i> and <i>Hesperioidea</i> ): a revised species checklist; including two updates: <i>Acraea serena</i> updated to 'non endemic' based on (15) and <i>Caropsilia thauruma</i> updated to 'non endemic' based on (16). Additionally, three species of the <i>Heteropsis</i> genus that are not listed in Lees et al., 2003 (14) were classified as endemic since the whole <i>Heteropsis</i> genus is endemic to Madagascar (14). | Lees et al., 2003 (14)               |
| Ants              | AntWeb Database                                                                                                                                                                                                                                                                                                                                                                                                                                                                                                | Antweb Database (17)                 |

93

94 **SI References**

- 95 1. D. A. Martin, *et al.*, Land-use history determines ecosystem services and conservation value  
96 in tropical agroforestry. *Conservation Letters* **13**, e12740 (2020).
- 97 2. D. A. Martin, *et al.*, Bird diversity and endemism along a land-use gradient in Madagascar:  
98 The conservation value of vanilla agroforests. *Biotropica* **53**, 179–190 (2021).
- 99 3. H. Hänke, *et al.*, Socio-economic, land use and value chain perspectives on vanilla farming in  
100 the SAVA Region (north-eastern Madagascar): The Diversity Turn Baseline Study (DTBS).  
101 July 2019 Edition. (2018).
- 102 4. J. Chave, *et al.*, Improved allometric models to estimate the aboveground biomass of tropical  
103 trees. *Global Change Biology* **20**, 3177–3190 (2014).
- 104 5. R. Condit, Methods for estimating aboveground biomass of forest and replacement  
105 vegetation in the tropics. *Center for Tropical Forest Science Research Manual* **73**, 1–73  
106 (2008).
- 107 6. J. Chave, *et al.*, Towards a worldwide wood economics spectrum. *Ecology Letters* **12**, 351–  
108 366 (2009).
- 109 7. J. Chave, *et al.*, Tree allometry and improved estimation of carbon stocks and balance in  
110 tropical forests. *Oecologia* **145**, 87–99 (2005).
- 111 8. D. Hertel, Tree roots in canopy soils of old European beech trees—An ecological  
112 reassessment of a forgotten phenomenon. *Pedobiologia* **54**, 119–125 (2011).
- 113 9. D. J. McConnell, D. J. MacConnell, J. L. Dillon, *Farm management for Asia: a systems*  
114 *approach* (Food & Agriculture Org., 1997).
- 115 10. Missouri Botanical Garden, *Catalogue of the Plants of Madagascar*. (Missouri Botanical  
116 Garden, St. Louis; Antananarivo Madagascar, 2019).
- 117 11. BirdLife International, *BirdLife International: Data Zone* (2018).
- 118 12. AmphibiaWeb, “AmphibiaWeb Database” (2020).
- 119 13. P. Uetz, J. Hošek, Reptile Database (2020).
- 120 14. D. C. Lees, C. Kremen, T. Raharitsimba, S. M. Goodman, J. P. Benstead, *Classification,*  
121 *diversity, and endemism of the butterflies (Papilionoidea and Hesperioidea): a revised*  
122 *species checklist* (Chicago University Press, 2003).
- 123 15. J. Pierre, D. Bernaud (1999). *Acraea serena* (Fabricius, 1775)(=*Acraea eponina* Cramer,  
124 1780), problème de nomenclature et premiers états (Lepidoptera, Nymphalidae). *Bulletin de*  
125 *la société entomologique de France*, **104**(4), 357-364.
- 126 16. J.M. Lawrence (2016). Recent butterfly observations from Mauritius. *Metamorphosis*, **27**, 6-  
127 14.
- 128 17. Antweb, Antweb database (2020) (November 27, 2020).
- 129
